# Supplementary material
Source: Springer Nature journal article supplement (https://www.springermedizin.de/resource/supplementary/12939_2013_536_MOESM4_ESM.pdf/9551176)

**A**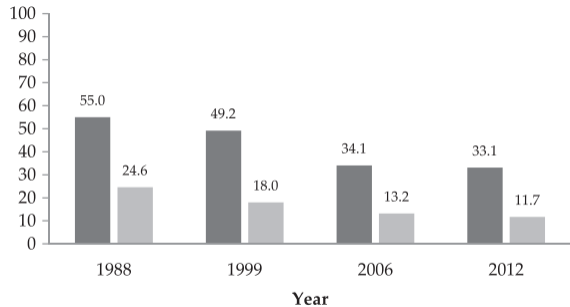

■ Indigenous ■ Non-indigenous

**B**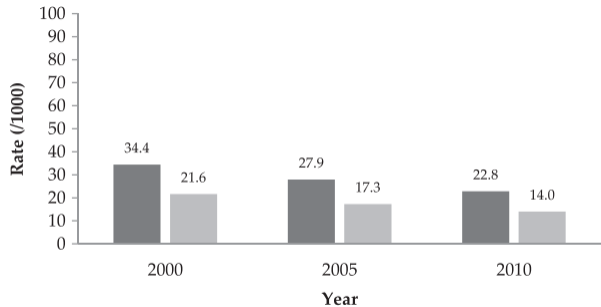

■ Indigenous ■ Non-indigenous

Supplement: MOESM4 [file 9551176]
